# Supplementary material for: Insight into the Natural History of Pathogenic Variant c.919-2A>G in the SLC26A4 Gene Involved in Hearing Loss: The Evidence for Its Common Origin in Southern Siberia (Russia)
Source: MDPI journal article supplement (doi:10.3390/genes14040928), 2023-04-17
Supplement: s1 [file s1]

**Table S3.** The allelic frequencies of STRs (D7S2420, D7S496, D7S2459, D7S2456, and D7S525) in patients homozygous for c.919-2A>G and in the control sample.

| STRs<br>(distance to<br>c.919-2A>G) | Allele * | Patients homozygous<br>for c.919-2A>G (n=23) |                         | Control sample<br>(n=63) |                         | <i>p</i>                    | $\delta$      |
|-------------------------------------|----------|----------------------------------------------|-------------------------|--------------------------|-------------------------|-----------------------------|---------------|
|                                     |          | Number<br>of alleles                         | Frequency<br>of alleles | Number<br>of alleles     | Frequency<br>of alleles |                             |               |
| <b>D7S2420</b><br>(~ 0.43 Mb)       | 276      | 0                                            | 0.0                     | 1                        | 0.0079                  | 0.7326                      | -0.0080       |
|                                     | 278      | 46                                           | 1.0                     | 10                       | 0.0794                  | <b>&lt;10<sup>-31</sup></b> | <b>1.0</b>    |
|                                     | 280      | 0                                            | 0.0                     | 17                       | 0.1349                  | <b>0.0037</b>               | -0.1560       |
|                                     | 282      | 0                                            | 0.0                     | 17                       | 0.1349                  | <b>0.0037</b>               | -0.1560       |
|                                     | 284      | 0                                            | 0.0                     | 24                       | 0.1905                  | <b>&lt;10<sup>-3</sup></b>  | -0.2353       |
|                                     | 286      | 0                                            | 0.0                     | 19                       | 0.1508                  | <b>0.0018</b>               | -0.1776       |
|                                     | 288      | 0                                            | 0.0                     | 21                       | 0.1667                  | <b>&lt;10<sup>-3</sup></b>  | -0.2000       |
|                                     | 290      | 0                                            | 0.0                     | 8                        | 0.0635                  | 0.0780                      | -0.0678       |
|                                     | 292      | 0                                            | 0.0                     | 6                        | 0.0476                  | 0.1496                      | -0.0500       |
|                                     | 294      | 0                                            | 0.0                     | 3                        | 0.0238                  | 0.3906                      | -0.0244       |
|                                     | Total    | 46                                           | 1.0                     | 126                      | 1.0                     |                             |               |
| <b>D7S496</b><br>(~ 0.17 Mb)        | 118      | 0                                            | 0.0                     | 23                       | 0.1825                  | <b>&lt;10<sup>-3</sup></b>  | -0.2233       |
|                                     | 120      | 46                                           | 1.0                     | 3                        | 0.0238                  | <b>&lt;10<sup>-37</sup></b> | <b>1.0</b>    |
|                                     | 126      | 0                                            | 0.0                     | 1                        | 0.0079                  | 0.7326                      | -0.0080       |
|                                     | 128      | 0                                            | 0.0                     | 4                        | 0.0317                  | 0.2843                      | -0.0328       |
|                                     | 130      | 0                                            | 0.0                     | 14                       | 0.1111                  | <b>0.0104</b>               | -0.1250       |
|                                     | 132      | 0                                            | 0.0                     | 13                       | 0.1032                  | <b>0.0147</b>               | -0.1150       |
|                                     | 134      | 0                                            | 0.0                     | 61                       | 0.4841                  | <b>&lt;10<sup>-10</sup></b> | -0.9385       |
|                                     | 136      | 0                                            | 0.0                     | 3                        | 0.0238                  | 0.3906                      | -0.0244       |
|                                     | 138      | 0                                            | 0.0                     | 3                        | 0.0238                  | 0.3906                      | -0.0244       |
|                                     | 144      | 0                                            | 0.0                     | 1                        | 0.0079                  | 0.7326                      | -0.0080       |
|                                     | Total    | 46                                           | 1.0                     | 126                      | 1.0                     |                             |               |
| <b>c.919-2A&gt;G</b>                |          |                                              |                         |                          |                         |                             |               |
| <b>D7S2459</b><br>(~ 7.6 kb)        | 139      | 0                                            | 0.0                     | 5                        | 0.0397                  | 0.2064                      | -0.0413       |
|                                     | 141      | 0                                            | 0.0                     | 10                       | 0.0794                  | <b>0.0403</b>               | -0.0862       |
|                                     | 143      | 0                                            | 0.0                     | 3                        | 0.0238                  | 0.3906                      | -0.0244       |
|                                     | 145      | 0                                            | 0.0                     | 59                       | 0.4683                  | <b>&lt;10<sup>-10</sup></b> | -0.8806       |
|                                     | 147      | 46                                           | 1.0                     | 27                       | 0.2143                  | <b>&lt;10<sup>-22</sup></b> | <b>1.0</b>    |
|                                     | 149      | 0                                            | 0.0                     | 18                       | 0.1429                  | <b>0.0026</b>               | -0.1667       |
|                                     | 151      | 0                                            | 0.0                     | 4                        | 0.0317                  | 0.2843                      | -0.0328       |
|                                     | Total    | 46                                           | 1.0                     | 126                      | 1.0                     |                             |               |
| <b>D7S2456</b><br>(~ 0.36 Mb)       | 244      | 46                                           | 1.0                     | 73                       | 0.5794                  | 1.0                         | <b>1.0</b>    |
|                                     | 246      | 0                                            | 0.0                     | 36                       | 0.2857                  | <b>&lt;10<sup>-5</sup></b>  | -0.4000       |
|                                     | 248      | 0                                            | 0.0                     | 2                        | 0.0159                  | 0.5355                      | -0.0161       |
|                                     | 250      | 0                                            | 0.0                     | 14                       | 0.1111                  | <b>0.0104</b>               | -0.1250       |
|                                     | 252      | 0                                            | 0.0                     | 1                        | 0.0079                  | 0.7326                      | -0.0080       |
|                                     | Total    | 46                                           | 0.0                     | 126                      | 1.0                     |                             |               |
| <b>D7S525</b><br>(~ 2.32 Mb)        | 209      | 0                                            | 0.0                     | 2                        | 0.0159                  | 0.5355                      | -0.0161       |
|                                     | 219      | 0                                            | 0.0                     | 2                        | 0.0159                  | 0.5355                      | -0.0161       |
|                                     | 221      | 1                                            | 0.0217                  | 36                       | 0.2857                  | <b>&lt;10<sup>-4</sup></b>  | -0.3696       |
|                                     | 223      | 0                                            | 0.0                     | 5                        | 0.0397                  | 0.2064                      | -0.0413       |
|                                     | 225      | 1                                            | 0.0217                  | 4                        | 0.0317                  | 0.5956                      | -0.0103       |
|                                     | 227      | 42                                           | 0.9130                  | 50                       | 0.3968                  | <b>&lt;10<sup>-9</sup></b>  | <b>0.8558</b> |
|                                     | 229      | 2                                            | 0.0435                  | 19                       | 0.1508                  | <b>0.0430</b>               | -0.1264       |
|                                     | 231      | 0                                            | 0.0000                  | 8                        | 0.0635                  | 0.0780                      | -0.0678       |
|                                     | Total    | 46                                           | 1.0                     | 126                      | 1.0                     |                             |               |

\* – Designation of the STR allele corresponds to its size in nucleotides; the maximum indices of linkage disequilibrium ( $\delta$ ) and statistically significant ( $p < 0.05$ ) differences in allele frequencies between the c.919-2A>G homozygotes and the control sample are in bold.
