# Supplementary material for: Insight into the Natural History of Pathogenic Variant c.919-2A>G in the SLC26A4 Gene Involved in Hearing Loss: The Evidence for Its Common Origin in Southern Siberia (Russia)
Source: MDPI journal article supplement (doi:10.3390/genes14040928), 2023-04-17
Supplement: s1 [file s1]

**Table S1.** Allelic frequencies of analyzed SNPs according to data from the Genome Aggregation Database (gnomAD v3.1.2, <https://gnomad.broadinstitute.org/>, accessed on 13 February 2023).

|                                    | SNPs<br>Position (GRCh38.13), Alleles<br>(distance from c.919-2A>G) | East<br>Asian | South<br>Asian | European<br>(non-<br>Finnish) | European<br>(Finnish) | Ashkenazi<br>Jewish | Middle<br>Eastern | Amish  | African /<br>African<br>American | Latino /<br>Admixed<br>American | Other  |
|------------------------------------|---------------------------------------------------------------------|---------------|----------------|-------------------------------|-----------------------|---------------------|-------------------|--------|----------------------------------|---------------------------------|--------|
| 1                                  | <b>rs2248464</b><br>7:107663177 A>T<br>(20276)                      | 0.6861        | 0.8506         | 0.7308                        | 0.7630                | 0.7630              | 0.7911            | 0.6850 | 0.7991                           | 0.7300                          | 0.7646 |
| 2                                  | <b>rs2248465</b><br>7:107663183 C>T<br>(20270)                      | 0.4481        | 0.7933         | 0.7261                        | 0.7630                | 0.6537              | 0.7500            | 0.6850 | 0.6651                           | 0.7073                          | 0.7157 |
| 3                                  | <b>rs3801943</b><br>7:107681221 T>A<br>(2232)                       | 0.1014        | 0.2271         | 0.2656                        | 0.2949                | 0.2635              | 0.1013            | 0.1754 | 0.1120                           | 0.2920                          | 0.1925 |
| 4                                  | <b>rs2712212 *</b><br>7:107681270 A>G<br>(2183)                     | 0.1926        | 0.2219         | 0.2639                        | 0.1467                | 0.2617              | 0.3312            | 0.4824 | 0.3011                           | 0.2815                          | 0.2965 |
| <b>c.919-2A&gt;G (7:107683453)</b> |                                                                     |               |                |                               |                       |                     |                   |        |                                  |                                 |        |
| 5                                  | <b>rs2395911 *</b><br>7:107683668 G>T<br>(215)                      | 0.6376        | 0.5806         | 0.7437                        | 0.6848                | 0.7336              | 0.6835            | 0.7796 | 0.8559                           | 0.6652                          | 0.7514 |
| 6                                  | <b>rs2712211 *</b><br>7:107685692 C>G<br>(2024)                     | 0.3580        | 0.4168         | 0.2553                        | 0.3148                | 0.2666              | 0.3101            | 0.2204 | 0.07436                          | 0.3253                          | 0.2361 |
| 7                                  | <b>rs3801940 *</b><br>7:107685771 C>G<br>(2318)                     | 0.6320        | 0.4513         | 0.6230                        | 0.6249                | 0.5530              | 0.4589            | 0.5890 | 0.6062                           | 0.5516                          | 0.5856 |
| 8                                  | <b>rs2072064</b><br>7:107694068 T>A<br>(10615)                      | 0.3566        | 0.4366         | 0.2545                        | 0.3237                | 0.2380              | 0.2500            | 0.2165 | 0.04975                          | 0.3101                          | 0.2131 |
| 9                                  | <b>rs2072065</b><br>7:107694216 C>T<br>(10763)                      | 0.6313        | 0.3954         | 0.4478                        | 0.4666                | 0.4741              | 0.3548            | 0.5022 | 0.4611                           | 0.4497                          | 0.4622 |

\* – rs2712212, rs2395911, rs2712211, and rs3801940 were included for comparative analysis with the data from the study by Wu et al. [12].
