# Supplementary material for: Insight into the Natural History of Pathogenic Variant c.919-2A>G in the SLC26A4 Gene Involved in Hearing Loss: The Evidence for Its Common Origin in Southern Siberia (Russia)
Source: MDPI journal article supplement (doi:10.3390/genes14040928), 2023-04-17
Supplement: s1 [file s1]

**Table S4.** The genotypes and the allelic frequencies of analyzed SNPs in patients homozygous for c.919-2A>G and in the control sample.

| SNPs<br>(distance from<br>c.919-2A>G) | Genotypes | Homozygotes<br>for c.919-<br>2A>G<br>(n=23) | Controls<br>(n=23) | Alleles | Homozygotes<br>for c.919-2A>G |                         | Controls             |                         | <i>p</i>                         | $\delta$   |
|---------------------------------------|-----------|---------------------------------------------|--------------------|---------|-------------------------------|-------------------------|----------------------|-------------------------|----------------------------------|------------|
|                                       |           |                                             |                    |         | Number<br>of alleles          | Frequency<br>of alleles | Number<br>of alleles | Frequency<br>of alleles |                                  |            |
| rs2248464<br>(20276)                  | AA        | 23                                          | 4                  | A       | 46                            | 1.0                     | 26                   | 0.2063                  | <b>0.1697 x 10<sup>-22</sup></b> | <b>1.0</b> |
|                                       | AT        | 0                                           | 18                 |         |                               |                         |                      |                         |                                  |            |
|                                       | TT        | 0                                           | 41                 | T       | 0                             | 0.0                     | 100                  | 0.7937                  | <b>0.1687 x 10<sup>-22</sup></b> | -3.8462    |
|                                       | Total     | 23                                          | 63                 |         |                               |                         |                      |                         |                                  |            |
| rs2248465<br>(20270)                  | CC        | 23                                          | 9                  | C       | 46                            | 1.0                     | 40                   | 0.3175                  | <b>0.3332 x 10<sup>-17</sup></b> | <b>1.0</b> |
|                                       | CT        | 0                                           | 22                 |         |                               |                         |                      |                         |                                  |            |
|                                       | TT        | 0                                           | 32                 | T       | 0                             | 0.0                     | 86                   | 0.6825                  | <b>0.3300 x 10<sup>-17</sup></b> | -2.1500    |
|                                       | Total     | 23                                          | 63                 |         |                               |                         |                      |                         |                                  |            |
| rs3801943<br>(2232)                   | TT        | 23                                          | 45                 | T       | 46                            | 1.0                     | 107                  | 0.8492                  | 1.0                              | <b>1.0</b> |
|                                       | TA        | 0                                           | 17                 |         |                               |                         |                      |                         |                                  |            |
|                                       | AA        | 0                                           | 1                  | A       | 0                             | 0.0                     | 19                   | 0.1508                  | <b>0.1818 x 10<sup>-2</sup></b>  | -0.1776    |
|                                       | Total     | 23                                          | 63                 |         |                               |                         |                      |                         |                                  |            |
| rs2712212 *<br>(2183)                 | AA        | 23                                          | 28                 | A       | 46                            | 1.0                     | 84                   | 0.6667                  | 1.0                              | <b>1.0</b> |
|                                       | AG        | 0                                           | 28                 |         |                               |                         |                      |                         |                                  |            |
|                                       | GG        | 0                                           | 7                  | G       | 0                             | 0.0                     | 42                   | 0.3333                  | <b>0.2168 x 10<sup>-6</sup></b>  | -0.5000    |
|                                       | Total     | 23                                          | 63                 |         |                               |                         |                      |                         |                                  |            |
| c.919-2A>G                            |           |                                             |                    |         |                               |                         |                      |                         |                                  |            |
| rs2395911 *<br>(215)                  | GG        | 23                                          | 9                  | G       | 46                            | 1.0                     | 44                   | 0.3492                  | <b>0.6282x 10<sup>-16</sup></b>  | <b>1.0</b> |
|                                       | GT        | 0                                           | 26                 |         |                               |                         |                      |                         |                                  |            |
|                                       | TT        | 0                                           | 28                 | T       | 0                             | 0.0                     | 82                   | 0.6508                  | <b>0.6211 x 10<sup>-16</sup></b> | -1.8636    |
|                                       | Total     | 23                                          | 63                 |         |                               |                         |                      |                         |                                  |            |
| rs2712211 *<br>(2024)                 | CC        | 0                                           | 26                 | C       | 0                             | 0.0                     | 78                   | 0.6190                  | <b>0.9734 x 10<sup>-15</sup></b> | -1.6250    |
|                                       | CG        | 0                                           | 26                 |         |                               |                         |                      |                         |                                  |            |
|                                       | GG        | 23                                          | 11                 | G       | 46                            | 1.0                     | 48                   | 0.3810                  | 1.0                              | <b>1.0</b> |
|                                       | Total     | 23                                          | 63                 |         |                               |                         |                      |                         |                                  |            |
| rs3801940 *<br>(2318)                 | CC        | 23                                          | 14                 | C       | 46                            | 1.0                     | 56                   | 0.4444                  | 1.0                              | <b>1.0</b> |
|                                       | CG        | 0                                           | 28                 |         |                               |                         |                      |                         |                                  |            |
|                                       | GG        | 0                                           | 21                 | G       | 0                             | 0.0                     | 70                   | 0.5556                  | <b>0.1503 x 10<sup>-12</sup></b> | -1.2500    |
|                                       | Total     | 23                                          | 63                 |         |                               |                         |                      |                         |                                  |            |
| rs2072064<br>(10615)                  | TT        | 0                                           | 25                 | T       | 0                             | 0.0                     | 75                   | 0.5952                  | <b>0.6892 x 10<sup>-14</sup></b> | 1.4706     |
|                                       | TA        | 0                                           | 25                 |         |                               |                         |                      |                         |                                  |            |
|                                       | AA        | 23                                          | 13                 | A       | 46                            | 1.0                     | 51                   | 0.4048                  | 1.0                              | <b>1.0</b> |
|                                       | Total     | 23                                          | 63                 |         |                               |                         |                      |                         |                                  |            |
| rs2072065<br>(10763)                  | CC        | 23                                          | 16                 | C       | 46                            | 1.0                     | 64                   | 0.5079                  | 1.0                              | <b>1.0</b> |
|                                       | CT        | 0                                           | 32                 |         |                               |                         |                      |                         |                                  |            |
|                                       | TT        | 0                                           | 15                 | T       | 0                             | 0.0                     | 62                   | 0.4921                  | <b>0.1391 x 10<sup>-10</sup></b> | -0.9688    |
|                                       | Total     | 23                                          | 63                 |         |                               |                         |                      |                         |                                  |            |

\* – rs2712212, rs2395911, rs2712211, and rs3801940 were included for comparative analysis with the data from the study by Wu et al. [12]. The maximum indices of linkage disequilibrium ( $\delta$ ) and statistically significant ( $p < 0.05$ ) differences in allele frequencies between the c.919-2A>G homozygotes and the control sample are in bold.
