# Supplementary material for: Insight into the Natural History of Pathogenic Variant c.919-2A>G in the SLC26A4 Gene Involved in Hearing Loss: The Evidence for Its Common Origin in Southern Siberia (Russia)
Source: MDPI journal article supplement (doi:10.3390/genes14040928), 2023-04-17
Supplement: s1 [file s1]

**Table S2.** Primer sequences for STR and SNP genotyping.

| <b>STRs*</b> |                                                                             |
|--------------|-----------------------------------------------------------------------------|
| D7S2420      | (PET) F: 5'-CCTGTATGGAGGGCAAACCTA-3'<br>R: 5'-AAATAATGACTGAGGCTCAAAACA-3'   |
| D7S496       | (VIC) F: 5'-AACAAACAGTCAACCCACAAT-3'<br>R: 5'-GCTATAACCTCATAATAAACCAAAA-3'  |
| D7S2459      | (PET) F: 5'-AAGAAGTGCATTGAGACTCC-3'<br>R: 5'-CCGCCTTAGTAAAACCC-3'           |
| D7S2456      | (VIC) F: 5'-CTGGAAATTGACCTGAAACCTT-3'<br>R: 5'-ACAGGGGTCTCTCACACATATTA-3'   |
| D7S525       | (NED) F: 5'-GTTAGCCGAGATTGCCC-3'<br>R: 5'-CTTGCTGTTTAAGTACCACAAGTTC-3'      |
| <b>SNPs</b>  |                                                                             |
| rs2248464    | F: 5'-TCGTCCTCGCTTACCGCGTGT-3'                                              |
| rs2248465    | R: 5'-CCATCTGTCACAGACCTATGGTAGCT-3'                                         |
| rs3801943    | F: 5'-CCTCTGGGATAGGTAGGGCT-3'                                               |
| rs2712212    | R: 5'-AGTAAGGAAATGGGGGAG-3'                                                 |
| rs2395911    | F: 5'-CATGGTTTTTCATGTGGGAAGATTTC-3'<br>R: 5'-CAAATGGCTTGACGTTTATCTACACAC-3' |
| rs2712211    | F: 5'-TAAGGCTGCTGCTCGTAGTT-3'                                               |
| rs3801940    | R: 5'-CTATAACAGAAGAGGTAAAA-3'                                               |
| rs2072064    | F: 5'-GAGCAGATATAGCATTTGATGAGATG-3'                                         |
| rs2072065    | R: 5'-CTCGGTGCGAGCCTTCCT-3'                                                 |

\* – Primer sequences for STRs genotyping were taken from the Ensembl Genome browser (<http://www.ensembl.org>). One (forward) from each primer pairs was marked on the 5' end with the different fluorescent dyes.
